# Supplementary material for: External dsRNA Downregulates Anthocyanin Biosynthesis-Related Genes and Affects Anthocyanin Accumulation in Arabidopsis thaliana
Source: MDPI journal article supplement (doi:10.3390/ijms22136749), 2021-06-23
Supplement: s1 [file s1]

**Supplementary Table S1** List of anthocyanins identified in the methanol extracts of *A. thaliana* rosettes.

| Peak | Rt (min) <sup>a</sup> | UV, λ <sub>max</sub> (nm) | MS (m/z) | MS <sup>2</sup> fragments (m/z) | Assignment |
|------|-----------------------|---------------------------|----------|---------------------------------|------------|
| 1    | 19,7                  | 527                       | 1137     | 535,889                         | A8         |
| 2    | 20,8                  | 520                       | 1258     | 1095,449                        | A10        |
| 3    | 21,8                  | 540                       | 1344     | 1095,535                        | A11        |
| 4    | 22,8                  | 535                       | 1344*    | 1095,535                        | A11*       |
| 5    | 24,1                  | 530                       | 1095     | 933,449                         | A7         |
| 6    | 25                    | 525                       | 975      | 727,535,287                     | A5         |
| 7    | 26                    | 530                       | 1182     | 1137,933,535,491                | A9         |
| 8    | 26,8                  | 535                       | 1182*    | 1137,933,535,491                | A9*        |

\*Asterisk indicates a tautomer.

A8 – Cyanidin 3-O-[2''-O-(xylosyl) 6''-O-(p-O-(glucosyl) p-coumaroyl) glucoside] 5-O-[6'''-O-(malonyl) glucoside].

A10 – Cyanidin 3-O-[2''-O-(2'''-O-(sinapoyl) xylosyl) 6''-O-(p-O-(glucosyl) p-coumaroyl) glucoside] 5-O-glucoside.

A11. Cyanidin 3-O-[2''-O-(6'''-O-(sinapoyl) xylosyl) 6''-O-(p-O-(glucosyl)-p-coumaroyl) glucoside] 5-O-(6''''-O-malonyl) glucoside.

A7 – Cyanidin 3-O-[2''-O-(2'''-O-(sinapoyl) xylosyl) 6''-O-(p-coumaroyl) glucoside] 5-O-glucoside.

A5 – Cyanidin 3-O-[2''-O-(xylosyl)-6''-O-(p-coumaroyl) glucoside] 5-O-malonylglucoside.

A9 – Cyanidin 3-O-[2''-O-(2'''-O-(sinapoyl) xylosyl) 6''-O-(p-O-coumaroyl) glucoside] 5-O-[6''''-O-(malonyl) glucoside].

**Supplementary Table S2** *In vitro*-synthesized single-stranded RNA oligonucleotides.

|   | RNA oligonucleotide name | 5' - 3' RNA oligonucleotides | Modification          |
|---|--------------------------|------------------------------|-----------------------|
| 1 | ssCHS-s                  | 5'-GUGACUGGAACUCCCUUCU       | 5' phosphate          |
| 2 | ssCHS-a                  | 5'-AAGAGGGAGUCCAGUCACUU      | 2'-O-methyl at 3' end |
| 3 | NPTII (R3-s-Me)          | 5'-AAUGGCCGCUUUUCUGGAUUC     | 5' phosphate          |
| 4 | NPTII (R3-a-Me)          | 5'-AUCCAGAAAAGCGGCCAUUUU     | 2'-O-methyl at 3' end |

**Supplementary Table S3** Primers used in RT-PCR and qRT-PCRs.

| Gene name<br>(ID number)                                     | Primer name                      | Primers, 5'-3'                                                                                               |
|--------------------------------------------------------------|----------------------------------|--------------------------------------------------------------------------------------------------------------|
| Primers for cloning full-length cDNA coding sequences, 5'-3' |                                  |                                                                                                              |
| <i>AtCHS</i><br>(AT5G13930.1)                                | AtCHS-Nach-S<br>AtCHS-konA       | 5' ATGGTGATGGCTGGTGCTTCTT<br>5' TTAGAGAGGAACGCTGTGCAAG                                                       |
| <i>AtMybL2</i><br>(AT1G71030.1)                              | AtMybL2-s1<br>AtMybL2-kon        | 5' ATGAACAAAACCCGCCTTC<br>5' TCATCGGAATAGAAGAAGC                                                             |
| <i>AtANAC032</i><br>(AT1G77450.1)                            | ANAC032-s1<br>ANAC032-kon        | 5' ATGATGAAATCTGGGGCTG<br>5' TCAGAAAGTTCCTGCCTA                                                              |
| Specific primers for dsRNA design, 5'-3'                     |                                  |                                                                                                              |
| <i>AtCHS</i><br>(AT5G13930.1)                                | AtCHS-RNAs2<br>AtCHS- RNA-a2     | 5' TAATACGACTCACTATAGGGAGAGCTTCTTGGTCTCC<br>GTCCTTCC<br>5' TAATACGACTCACTATAGGGAGATTAGAGAGGAACG<br>CTGTGCAAG |
| <i>AtMybL2</i><br>(AT1G71030.1)                              | MybL2-dsRNA-s1<br>MybL2-dsRNA-a1 | 5' TAATACGACTCACTATAGGGAGAATGAACAAAACCC<br>GCCTTC<br>5' TAATACGACTCACTATAGGGAGATCATCGGAATAGA<br>AGAAGCGTTT   |

|                                                       |                                          |                                                                                                                    |
|-------------------------------------------------------|------------------------------------------|--------------------------------------------------------------------------------------------------------------------|
|                                                       |                                          |                                                                                                                    |
| <i>AtANAC032</i><br>(AT1G77450.1)                     | ANA-dsRNA-s1<br><br>ANA-dsRNA-a1         | 5'TAATACGACTCACTATAGGGAGAATGATGAAATCTG<br>GGGCTGATTG<br><br>5'TAATACGACTCACTATAGGGAGATCAGAAAGTTCCC<br>TGCCTAACC    |
| <i>NPTII</i> (AY818371)                               | npt-T71-s<br><br>npt-T72-a               | 5'TAATACGACTCACTATAGGGAGAATGTGGATTGAAC<br>AAGATGGATTG<br><br>5'TAATACGACTCACTATAGGGAGATCCACCATGATATT<br>CGGCAAGCAG |
| Primers for cDNA check-up on DNA contamination, 5'-3' |                                          |                                                                                                                    |
| <i>AtGAPDH</i><br>(GenBank<br>NM_111283)              | AtGapdh-s<br>AtGapdh-a                   | 5'CTG GAA TGT CTT TCC GTG TC<br>5'ATT CGT TGT CGT ACC ATG AC                                                       |
| Primers for PCR and real-time PCR, 5'-3'              |                                          |                                                                                                                    |
| <i>AtCHS</i><br>(AT5G13930.1)                         | AtCHS-Nach-S<br>AtCHS-realA              | 5'ATGGTGATGGCTGGTGCTTCTT<br>5'- CACATGGTTCTCAGGGTTAGC                                                              |
| <i>AtMybL2</i><br>(AT1G71030.1)                       | AtMybL2-reals1<br>MybL2-3UTR-<br>realA1  | 5'TTGCCTGACCTAAACATTG<br>5'GCCGGTCCAATTCAGGATTAAC                                                                  |
| <i>AtANAC032</i><br>(AT1G77450.1)                     | ANAC032-reals1<br>AtANA-3UTR-real-<br>a1 | 5'CGTTTAATTACGTAGATGC<br>5'CACTTTCCACTAACTCTAATCGC                                                                 |
| <i>NPTII</i> (GenBank<br>AJ414108)                    | nptII-realS<br><br>nptII-realA           | 5'TTGCTGAAGAGCTTGGCGGCGAAT<br><br>5'TCAGAAGAAGCTCGTCAAGAAGG                                                        |
| <i>AtGAPDH</i><br>(GenBank<br>NM_111283)              | AtGapdh-real-s<br>AtGapdh-real-a         | 5'TTG GTG ACA ACA GGT CAA GCA<br>5'AAA CTT GTC GCT CAA TGC AAT                                                     |
| <i>AtUBQ</i><br>(GenBank<br>NM_001084884)             | AtUBQ-realS<br>AtUBQ-realA               | 5'GGCCTTGTATAATCCCTGATGAATAAG<br>5'AAAGAGATAACAGGAACGGAAACATAGT                                                    |

**Supplementary Fig. S1** Spectrophotometric results of total anthocyanins in the rosettes of *A. thaliana* grown under the control (+22°C, 16 h light) and anthocyanin-inducing (+7°C, 23 h light) conditions for seven days. (a) total anthocyanins in *A. thaliana* treated with sterile water or synthetic *AtCHS*- or *NPTII*-dsRNAs; (b) total anthocyanins in *A. thaliana* treated with sterile water or synthetic si*CHS* or si*NPTII*; (c) total anthocyanins in *A. thaliana* treated with sterile water or synthetic *MYBL2*- or *ANAC032*-dsRNAs.

WC – *A. thaliana* treated with sterile water, CHS – *A. thaliana* treated with *AtCHS*-dsRNAs, NPT – *A. thaliana* treated with *NPTII*-dsRNAs; siCHS – *A. thaliana* treated with *AtCHS*-siRNAs; siNPTII – *A. thaliana* treated with *NPTII*-siRNAs; MYB – *A. thaliana* treated with *AtMYB*-dsRNAs; ANA – *A. thaliana* treated with *AtANAC032*-dsRNAs; dpt – days post treatment.

One anthocyanin unit equals one absorbance unit [A530 - (1/4A657)] in 1 mL of extraction solution.

The data are presented as the mean ± SE (four independent experiments). Means followed by the same letter were not different using Student's *t* test.  $P \leq 0.05$  was considered statistically significant.

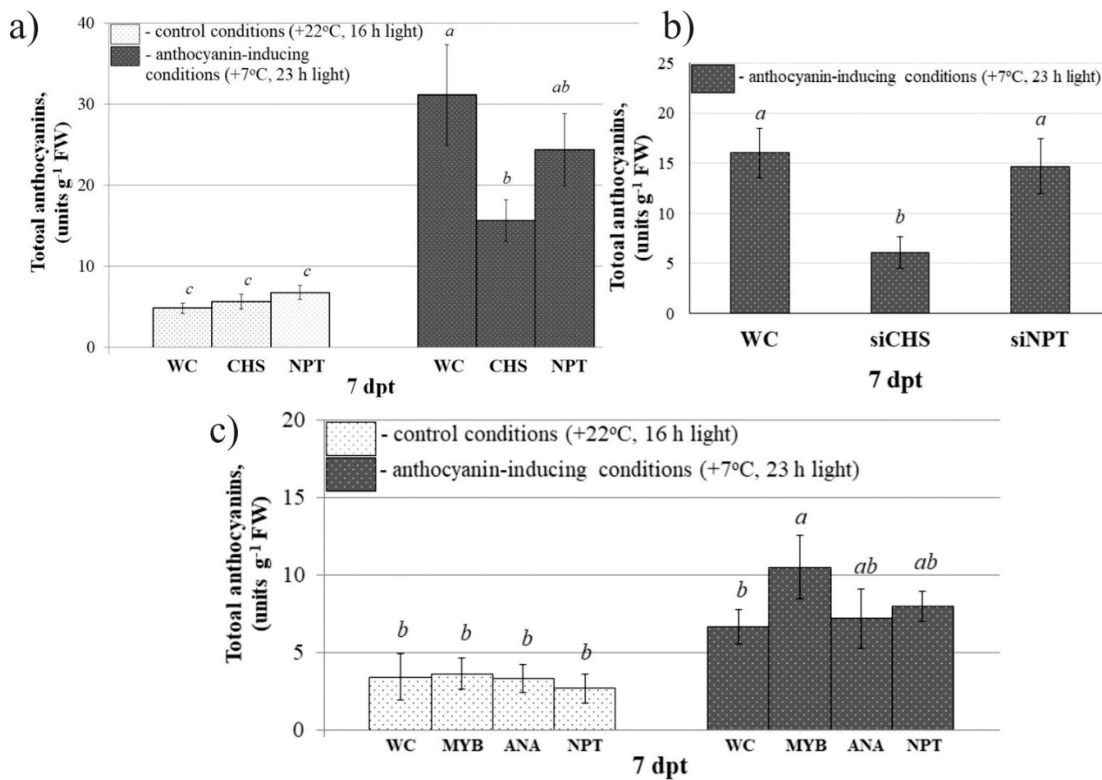

**Supplementary Fig. S2** HPLC profile of anthocyanins in the leaves of *Arabidopsis thaliana* grown under the control (+22°C, 16 h light) and anthocyanin-inducing (+7°C, 23 h light) conditions. WC – *A. thaliana* treated with sterile water, dsCHS – *A. thaliana* treated with *AtCHS*-dsRNAs, dsNPT – *A. thaliana* treated with *NPTII*-dsRNA. The data are presented as the mean  $\pm$  SE (three independent experiments). Means followed by the same letter were not different using Student's t test.  $p < 0.05$  was considered statistically significant. \* – Asterisk indicates a tautomer.

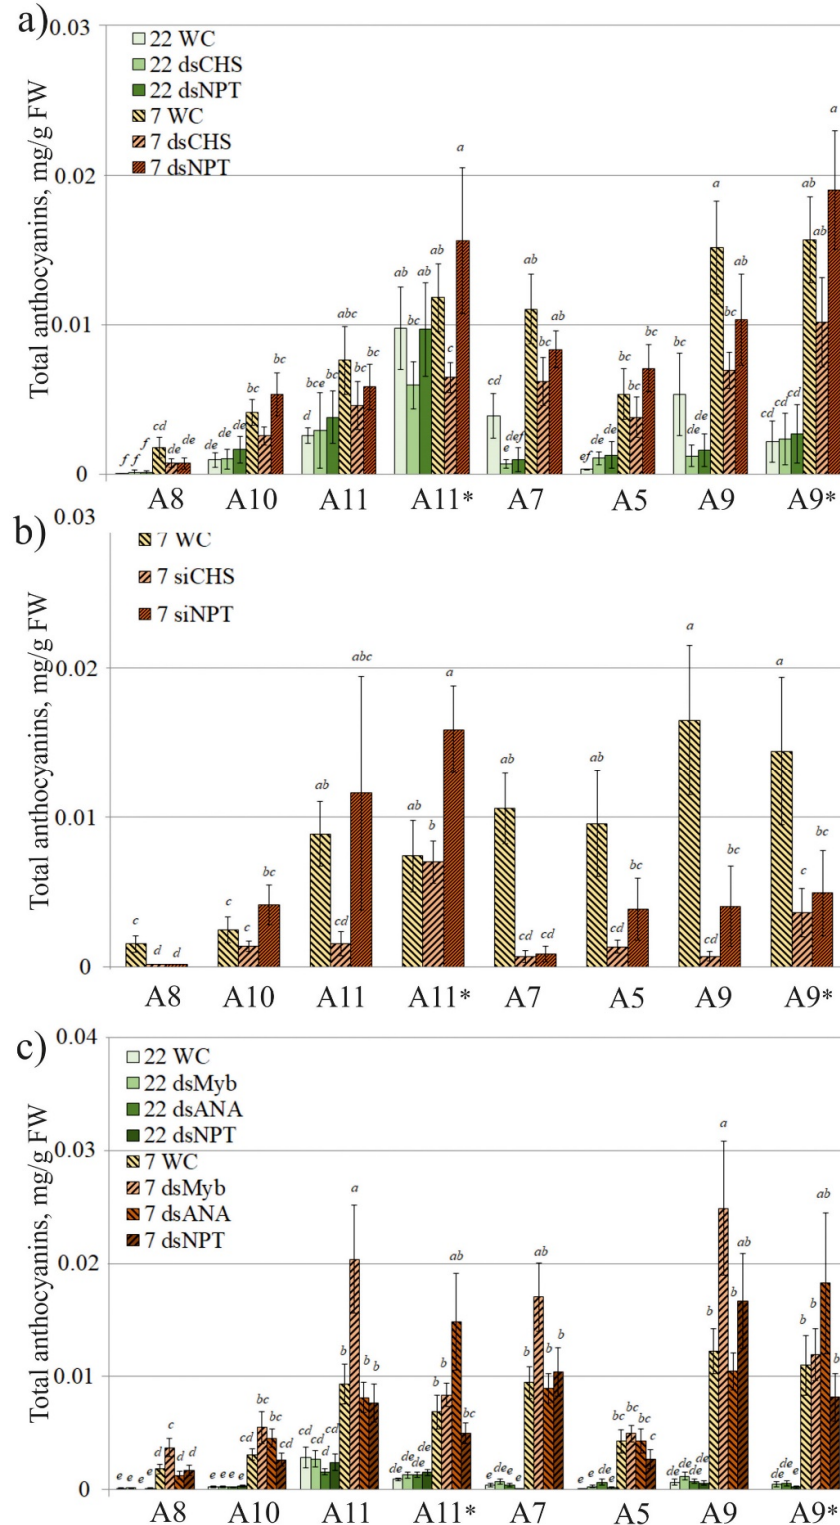

**Supplementary Fig. S3** Emission spectrum of Cy3 and chlorophyll obtained in the  $\lambda$ -scanning mode of Zeiss LSM 780 laser scanning microscope. Cy3 fluorescence (peak at  $\approx 570$  nm–580 nm) is highlighted in green and chlorophyll fluorescence (peak at  $\approx 690$  nm) is highlighted in red.

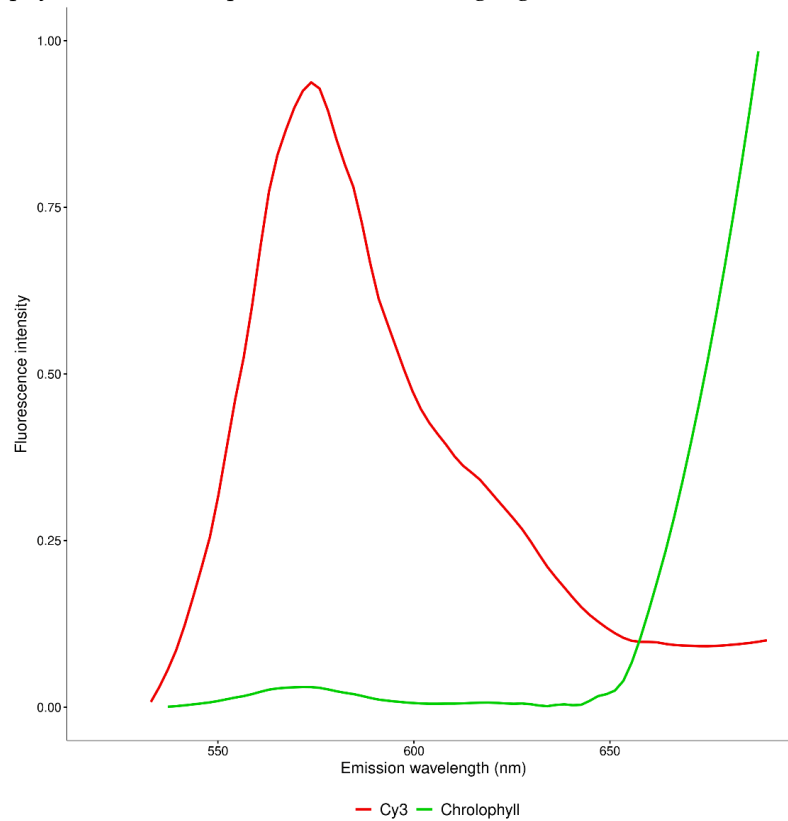

#### Supplementary Video S1

The dsRNAs were applied on the foliar surface of four-week-old *Arabidopsis thaliana* by spreading with individual soft brushes (natural pony hair) sterilized by autoclaving. All leaves of one rosette for each type of condition were treated on both the adaxial (upper) and abaxial (lower) sides. The leaf surface of each individual plant was treated with 0.35  $\mu\text{g}/\mu\text{L}$  of dsRNA or water (100  $\mu\text{L}$  per individual plant). For each dsRNA treatment, 35  $\mu\text{g}$  of the dsRNA were diluted in 100  $\mu\text{L}$  of nuclease-free water.
